# Supplementary material for: Unveiling the multifunctional regulation effect of a glutamine additive for highly reversible Zn metal anodes
Source: Royal Society of Chemistry journal article supplement (doi:10.1039/d3ta06593f), 2023-12-07
Supplement: d3ta06593f1.pdf [file d3ta06593f1.pdf]

## Supplementary Information

### **Unveiling the Multifunctional Regulation Effect of Glutamine for Highly-Reversible Zn Metal Anodes**

Junyi Yin<sup>a</sup>, Mingyan Li<sup>a,b</sup>, Xiang Feng<sup>a</sup>, Tianyi Cui<sup>c</sup>, Jingzhe Chen<sup>a</sup>, Fuxiang Li<sup>a</sup>,  
Minghui Wang<sup>a</sup>, Yonghong Cheng<sup>a</sup>, Shujiang Ding<sup>b</sup>, Xin Xu<sup>a\*</sup>, and Jianhua Wang<sup>a\*</sup>

<sup>a</sup> State Key Laboratory of Electrical Insulation and Power Equipment, School of Electrical Engineering, Xi'an Jiaotong University, Xi'an 710049, China

<sup>b</sup> Engineering Research Center of Energy Storage Materials and Devices, Ministry of Education and Xi'an Key Laboratory of Sustainable Energy Materials Chemistry, School of Chemistry, Xi'an Jiaotong University, Xi'an 710049, China

<sup>c</sup> China Power Complete Equipment Co., Ltd., Beijing 100080, China

\*Corresponding authors.

E-mail addresses: xu.xin@xjtu.edu.cn (X. Xu); jhwang@mail.xjtu.edu.cn (J. Wang).

## Density-Functional Theory Calculation Methods

All the computations were implemented with spin-polarized density functional theory (DFT) method, as performed by the Vienna ab initio simulation package (VASP)<sup>[1]</sup>. The projector augmented wavefunction (PAW) pseudo-potentials are used to describe ionic potentials<sup>[1]</sup>. The exchange correlation energy is sculptured by Perdew–Burke–Ernzerhof (PBE) functional within the generalized gradient approximation (GGA)<sup>[2]</sup>. In the course of the geometry relaxation, the energy cut-off was chosen as 500 eV. In structural optimizations, the Brillouin zone are sampled by  $15 \times 15 \times 7$  and  $3 \times 3 \times 1$  mesh points in k-space based on Monkhorst-Pack scheme<sup>[3]</sup> for Zn bulk and Zn(002) surface, respectively. The convergence criterion for the iteration in self-consistent field (SCF) is set to be  $10^{-5}$  eV, and the force convergence criterion for atomic relaxation is set to be 0.02 eV /Å. Grimme’s DFT-D3 methodology was used to describe the dispersion interactions. During structural optimizations, the bottom 2 atomic layers were fixed while the top two were allowed to relax for Zn (002). The vacuum gap is set as 15 Å to preclude interplay between two adjacent surfaces. The adsorption energy ( $\Delta E_{ad}$ ) of Glutamine and H<sub>2</sub>O molecule on Zn (002) surface is defined as:

$$\Delta E_{ads} = E_{total} - E_{slab} - E_{molecule} \quad (1)$$

where  $E_{total}$  represents the total energy of the Glutamine or H<sub>2</sub>O molecule adsorbed Zn (002) surface.  $E_{slab}$  represents the total energy of pure Zn (002) surface,  $E_{molecule}$  is the total energy of H<sub>2</sub>O or Glutamine molecule.

## Experimental Section

### Preparation of the Electrolytes.

To prepare 2 M ZnSO<sub>4</sub> electrolyte, ZnSO<sub>4</sub>·7H<sub>2</sub>O (Meryer, ≥99.5%) was dissolved into the deionized (DI) water. Then different amount of Gln powder was added to the 2 M ZnSO<sub>4</sub> electrolyte to obtain 0.1 M, 0.3 M and 0.5 M Gln-added electrolytes,

respectively. The optimized Gln concentration discussed in this paper is 0.3 M and marked as 'With Gln', unless otherwise stated.

### **Preparation of the Electrodes.**

$\text{NH}_4\text{V}_4\text{O}_{10}$  cathode materials were prepared by a hydrothermal method<sup>[4]</sup>. Concretely, 0.585 g of ammonium vanadate ( $\text{NH}_4\text{VO}_3$ , Aladdin, 99%) was added into 35 mL DI water. After that, 0.9455 g oxalic acid ( $\text{H}_2\text{C}_2\text{O}_4 \cdot 2\text{H}_2\text{O}$ , Meryer, 99%) powders were added into the  $\text{NH}_4\text{VO}_3$  solution under magnetically stirring. Then the solution was transferred to a 50 mL Teflon-lined autoclave and heated at 140 °C for 12 h. The products were collected and washed with DI water, then dried at 70 °C overnight to finally obtain the  $\text{NH}_4\text{V}_4\text{O}_{10}$  powders. The cathode slurry was composed of 70% as-prepared active material, 20% super P (Timcal) and 10% polymer binder (PVDF, Macklin). The cathode was prepared by coating the slurry on the stainless foil and was dried at 80 °C under vacuum for 12 h. The mass loading of the active materials is around 1.0-2.0 mg  $\text{cm}^{-2}$ . The anode was served by Zn foil only.

### **Materials Characterization**

Scanning electron microscope (SEM; ZEISS, Gemini 500) was used to acquire the morphology of anodes and cathodes with elemental mapping images. X-ray diffraction (XRD; Bruker D8 Advance) patterns of cathodes materials were recorded with a  $\text{Cu K}\alpha$  radiation ( $\lambda=1.54184 \text{ \AA}$ ). Fourier transform infrared spectrometer (FTIR; Bruker VERTEX70) spectra of Zn anodes were obtained to analyze the adsorption of Gln on anodes. Raman (Renishaw Raman RE01) spectra were collected with a 633 nm laser.

Nuclear magnetic resonance (NMR; JNM-ECZ400S/L1) was employed to analyze the solvation structures of  $\text{Zn}^{2+}$  in electrolytes.

### **Electrochemical Measurements**

The Zn symmetric cells and full cells for electrochemical tests were fabricated by assembling coin cells in air, employing glass microfiber (Whatman) as the separator, 80  $\mu\text{l}$  of electrolytes were added to each cell. The electrolyte for Zn// $\text{NH}_4\text{V}_4\text{O}_{10}$  full cells was 2 M  $\text{ZnSO}_4$  with/without 0.3 M Gln additive. The electrochemical performance of the batteries was conducted on the Neware battery tester and an electrochemical workstation (CHI 760E, CH Instruments, Ins).

**Supplementary Tables and Figures:**

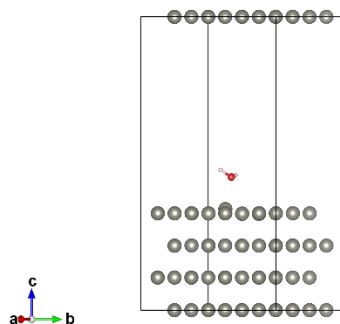

**Figure S1** Calculation models of free H<sub>2</sub>O molecule absorbed on Zn (002) plane.

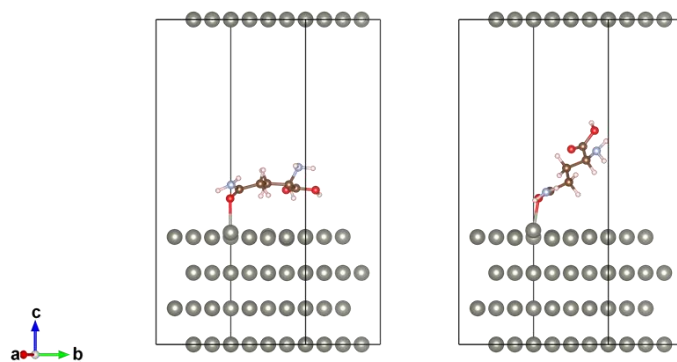

**Figure S2** Calculation models of latericumbent (left) and recumbent (right) Gln molecule absorbed on Zn (002) plane.

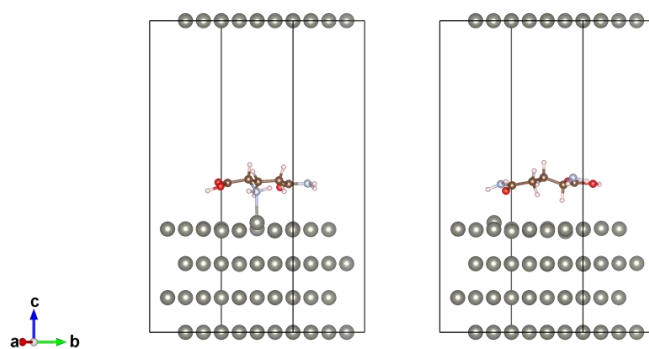

**Figure S3** Calculation models of parallel Gln molecule absorbed on Zn (002) plane.

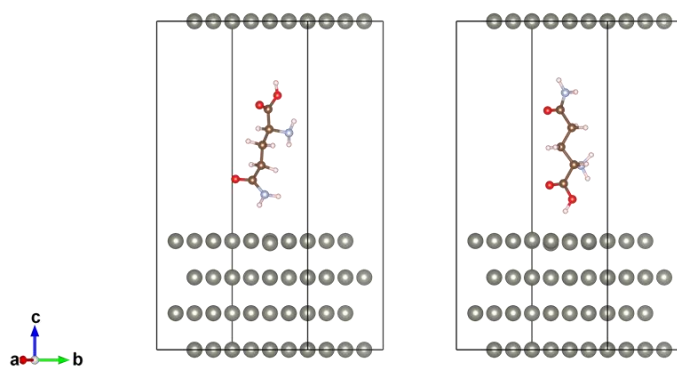

**Figure S4** Calculation models of verticle Gln molecule absorbed on Zn (002) plane.

**Table S1** Calculation results of H<sub>2</sub>O and Gln molecule absorbed on Zn (002) plane.

| Adsorbate        | Total energy/eV | Base energy/eV | Molecular energy/eV | $E_{\text{abs}}$ /eV |
|------------------|-----------------|----------------|---------------------|----------------------|
| H <sub>2</sub> O | -109.52377      | -95.01767      | -14.219016          | -0.29                |
| rec. gln         | -218.19817      | -95.01767      | -119.75286          | -3.43                |
| lat. gln         | -215.53253      | -95.01767      | -119.75286          | -0.76                |
| pall. gln 1      | -216.15324      | -95.01767      | -119.75286          | -1.38                |
| pall. gln 2      | -215.88195      | -95.01767      | -119.75286          | -1.11                |
| ver. gln 1       | -215.19796      | -95.01767      | -119.75286          | -0.43                |
| ver. gln 2       | -215.21414      | -95.01767      | -119.75286          | -0.44                |

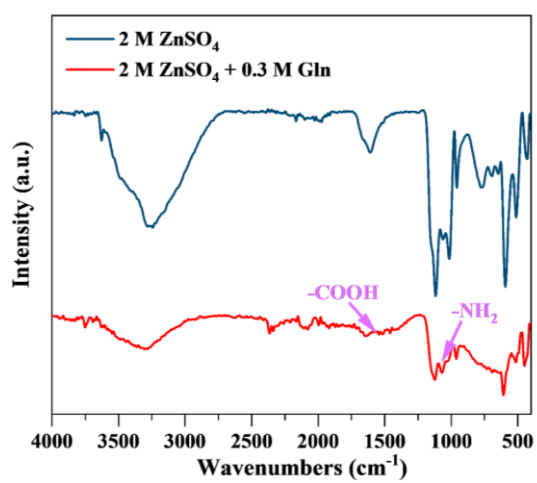

**Figure S5** FTIR results of Zn anodes immersed in 2 M ZnSO<sub>4</sub> and 2 M ZnSO<sub>4</sub> + 0.3 M Gln electrolytes.



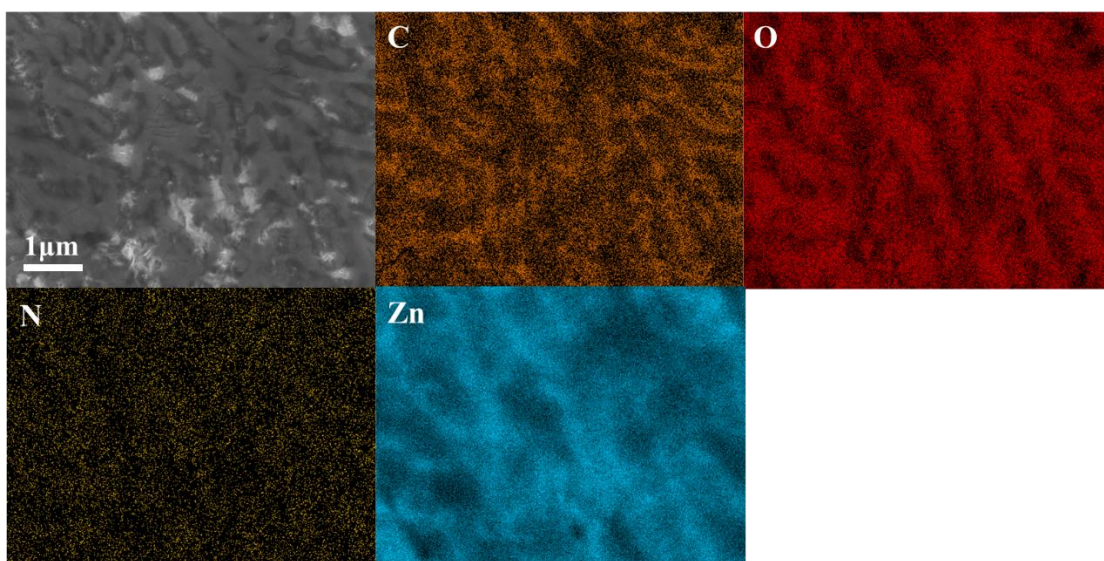

**Figure S6** Morphology and corresponding element mapping of Zn anode with ZnSO<sub>4</sub>/Gln electrolytes after cycling at 1 mA cm<sup>-2</sup>, 1 mAh cm<sup>-2</sup>.

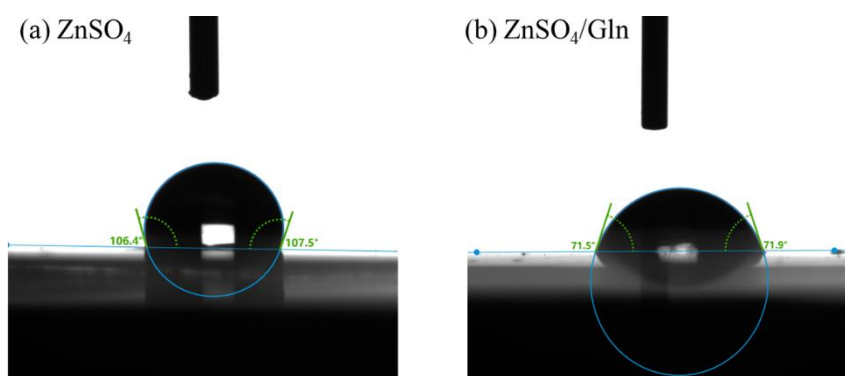

**Figure S7** Contact angles of between ZnSO<sub>4</sub> electrolytes without (a) and with (b) Gln additive and Zn anode.

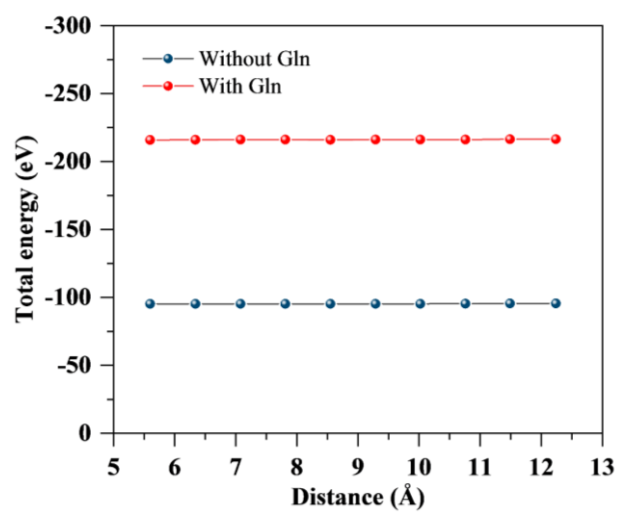

**Figure S8** Calculation results of total energies of  $\text{Zn}^{2+}$  moving at different sites with and without Gln molecule absorbed on Zn (002) plane.

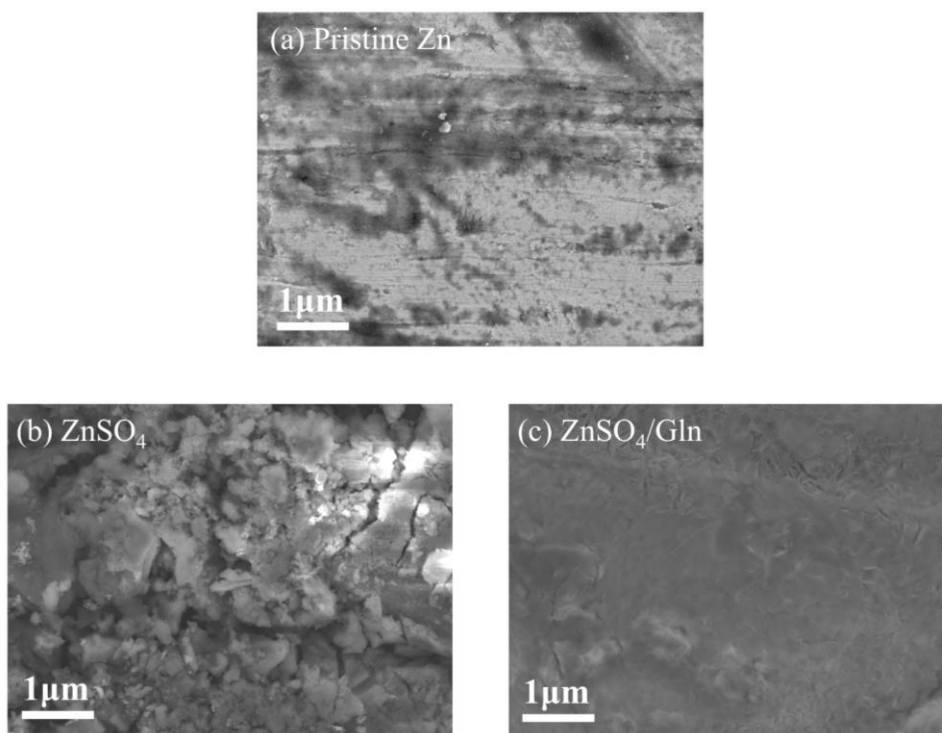

**Figure S9** SEM images of pristine Zn (a) and Zn anodes cycled in ZnSO<sub>4</sub> electrolytes without (b) and with (c) Gln additive.

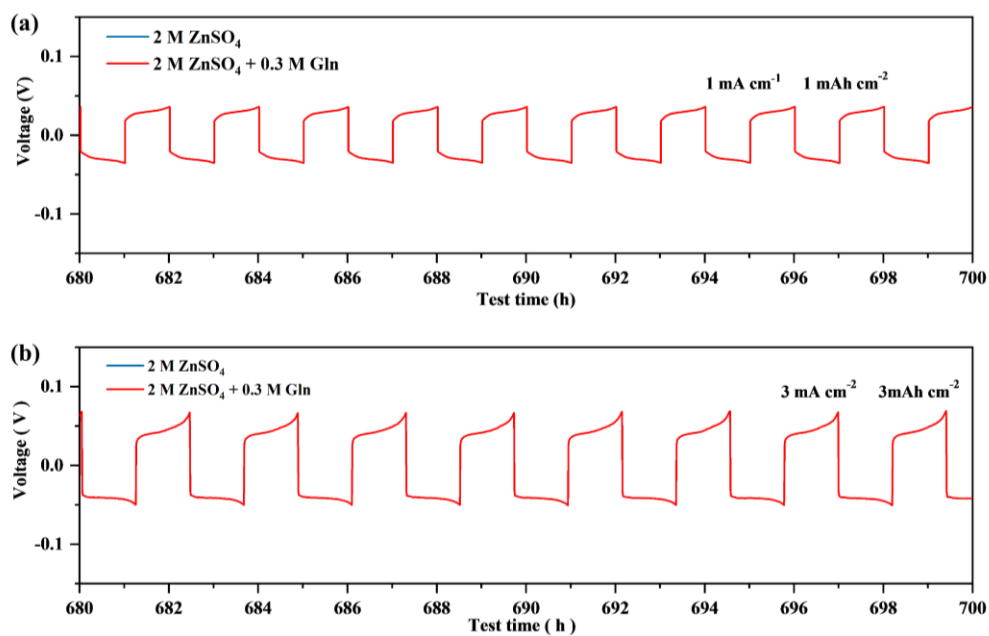

**Figure S10** Cycling stability of Zn//Zn batteries with ZnSO<sub>4</sub> and ZnSO<sub>4</sub>/Gln electrolytes under 1 mA cm<sup>-2</sup> (a) and 1 mA cm<sup>-2</sup> (b).

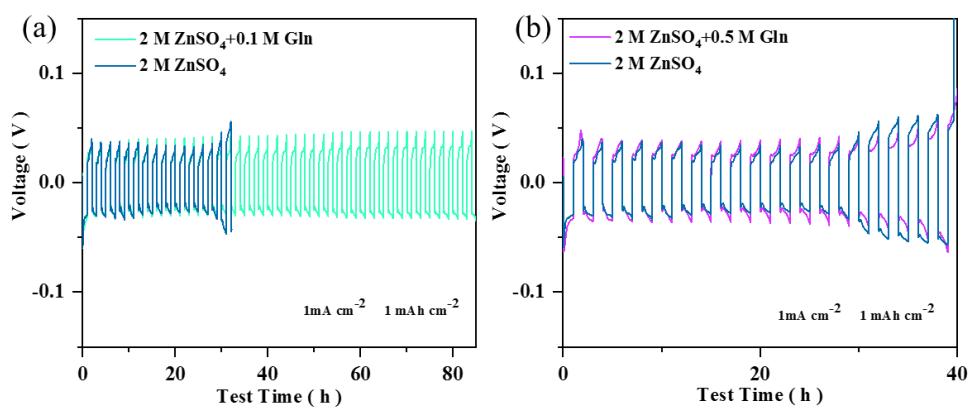

**Figure S11** Cycling performance of Zn//Zn batteries in  $2 \text{ M ZnSO}_4 + 0.1 \text{ M Gln}$  (a) and  $2 \text{ M ZnSO}_4 + 0.5 \text{ M Gln}$  (b) electrolytes.

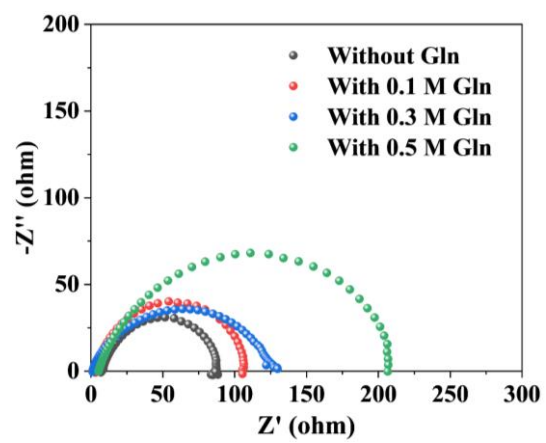

**Figure S12** Electrochemical impedance spectroscopy of batteries assembled with Gln at different concentrations.

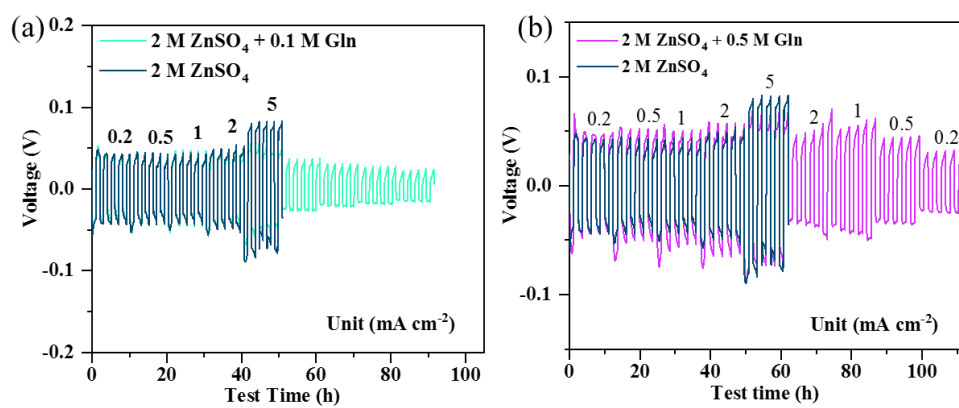

**Figure S13** Rate performance of Zn//Zn batteries in 2 M ZnSO<sub>4</sub> + 0.1 M Gln (a) and 2 M ZnSO<sub>4</sub> + 0.5 M Gln (b) electrolytes.



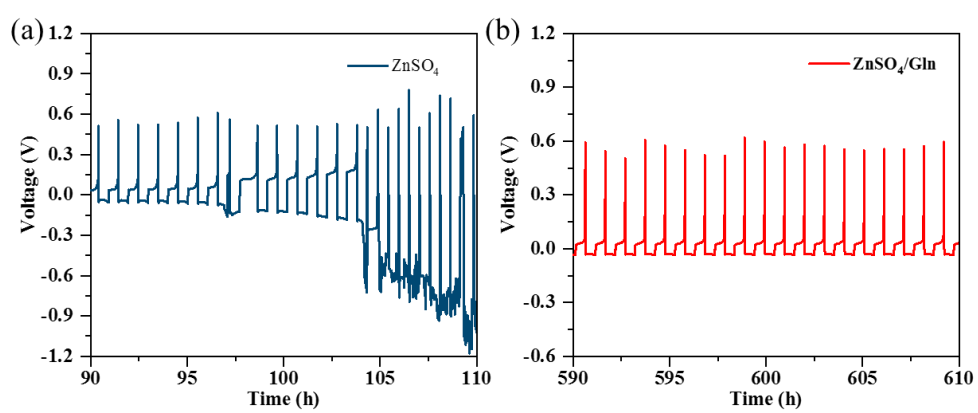

**Figure S14** Performance of Zn//Cu batteries in 2 M ZnSO<sub>4</sub> (a) and 2 M ZnSO<sub>4</sub> + 0.3 M Gln (b) electrolytes.

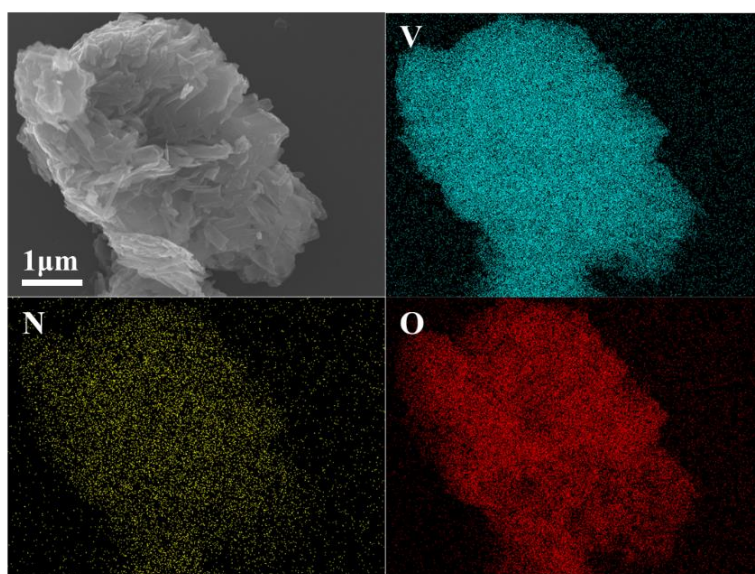

**Figure S15** SEM images of  $\text{NH}_4\text{V}_4\text{O}_{10}$  powder and corresponding element mappings.

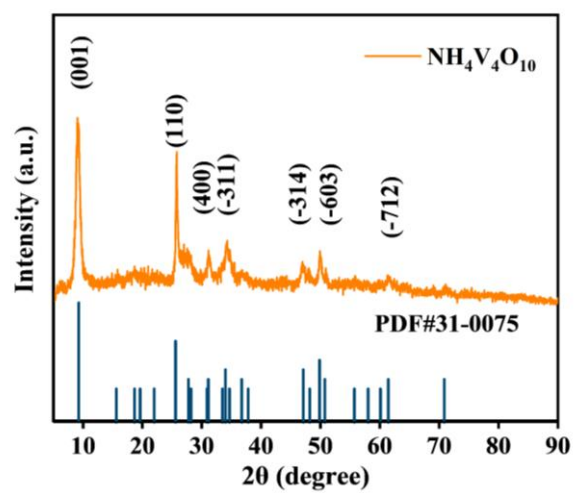

Figure S16 XRD patterns of  $\text{NH}_4\text{V}_4\text{O}_{10}$  powder.

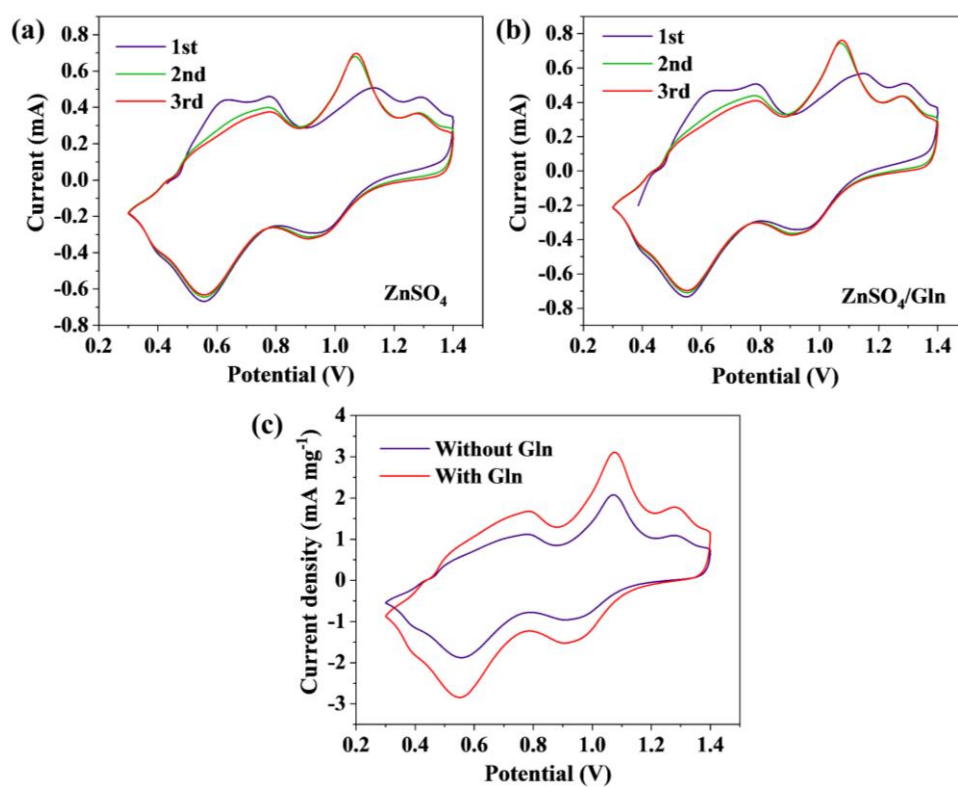

**Figure S17** CV profiles of Zn//NH<sub>4</sub>V<sub>4</sub>O<sub>10</sub> batteries with different electrolytes. (a) pure ZnSO<sub>4</sub> and (b) 0.3 M ZnSO<sub>4</sub>/Gln electrolyte. (c) Comparison of the 5<sup>th</sup> cycle of CV curves.

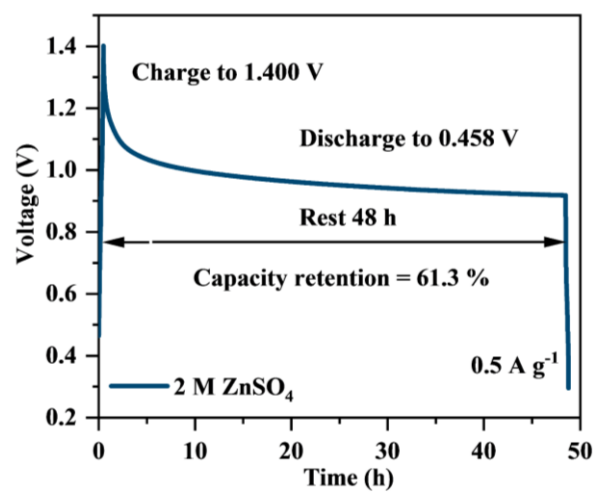

**Figure S18** Capacity retention capability of Zn//NH<sub>4</sub>V<sub>4</sub>O<sub>10</sub> full batteries with pristine ZnSO<sub>4</sub> electrolyte

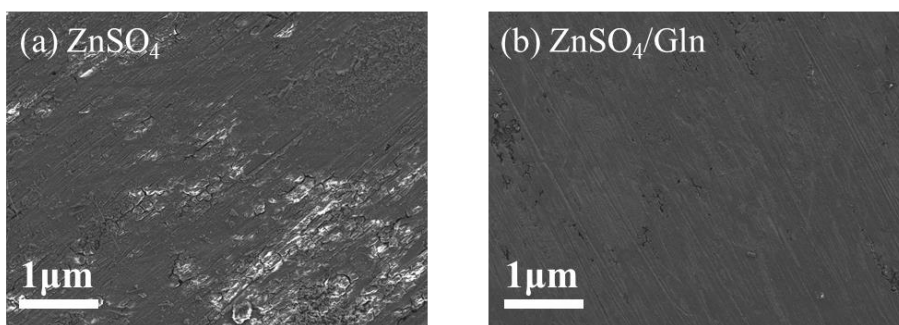

**Figure S19** SEM images of Zn anodes in Zn//NH<sub>4</sub>V<sub>4</sub>O<sub>10</sub> full batteries. ZnSO<sub>4</sub> (a) and ZnSO<sub>4</sub>/Gln (b).

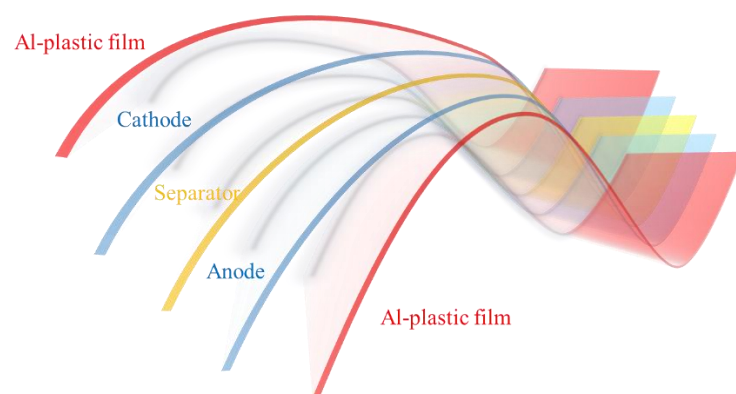

**Figure S20** Structure illustration of flexible quasi-solid-state batteries.

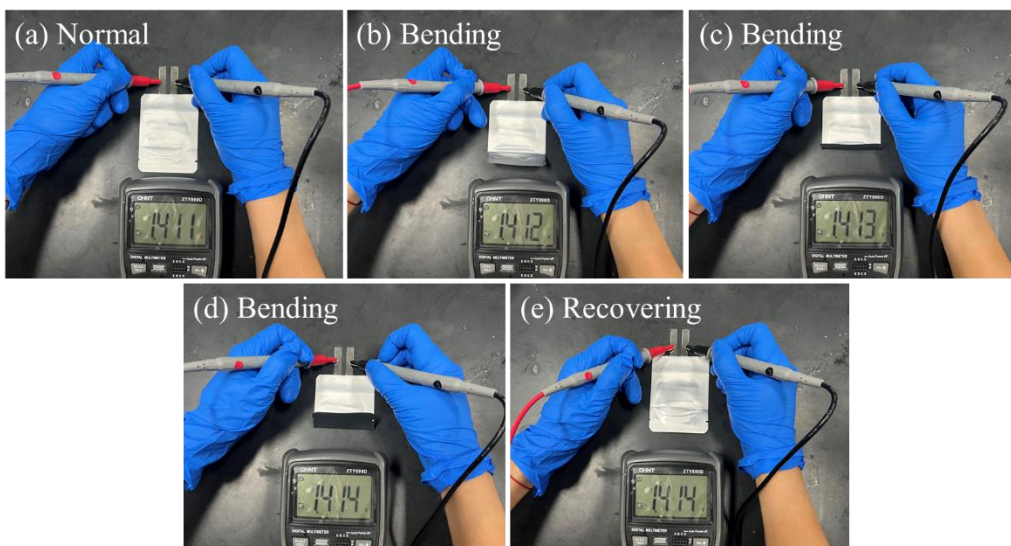

**Figure S21** Optical photos of flexible pouch batteries with various degrees of bending. (a) Normal, (b-d) Bending, (e) Recovering.



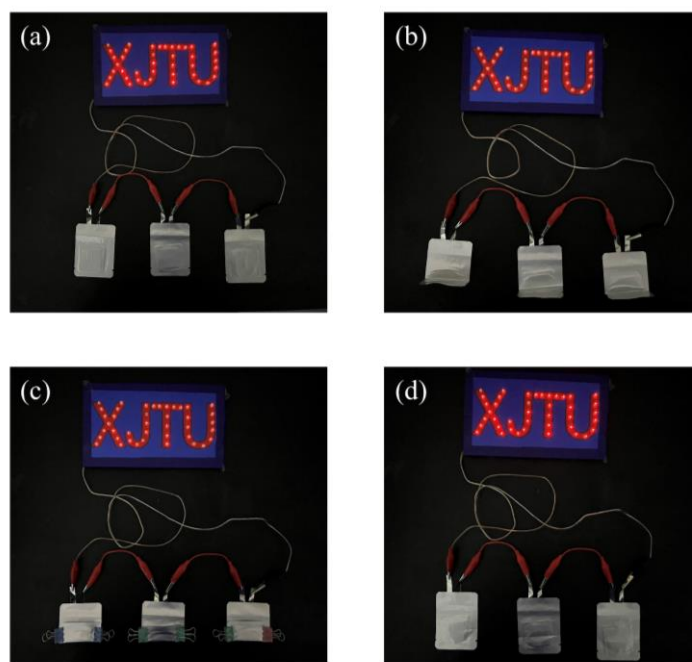

**Figure S22** Application of flexible pouch batteries under different bending conditions. (a) Normal, (b) Bending 90°, (c) Bending 180°, (d) Recovering.

**Table S2.** Performance comparison of symmetric Zn//Zn cells from the previously reported works involving electrolyte additives and our work.

| Electrolytes                                                      | Current density/Areal capacity (mA cm <sup>-2</sup> /mAh cm <sup>-2</sup> ) | Lifespan (h) | CPC (Ah cm <sup>-2</sup> ) | Refs. |
|-------------------------------------------------------------------|-----------------------------------------------------------------------------|--------------|----------------------------|-------|
| 1 M ZnAc <sub>2</sub> +4 M NH <sub>4</sub> I                      | 1/0.5                                                                       | 600          | 0.6                        | [5]   |
| 3 M ZnSO <sub>4</sub> +10 mM $\alpha$ -CD                         | 5/5                                                                         | 200          | 0.5                        | [6]   |
|                                                                   | 10/1                                                                        | 160          | 0.8                        |       |
| ZnSO <sub>4</sub> -H <sub>2</sub> O-NMP                           | 1/1                                                                         | 1500         | 0.75                       | [7]   |
|                                                                   | 5/10                                                                        | 200          | 0.5                        |       |
| 1 M Zn(ClO <sub>4</sub> ) <sub>2</sub> + $\beta$ -CD              | 1/1                                                                         | 1000         | 0.5                        | [8]   |
|                                                                   | 5/5                                                                         | 350          | 0.875                      |       |
| 2.5 m Zn(OTf) <sub>2</sub> +0.04 wt% POV                          | 0.5/0.25                                                                    | 1000         | 0.5                        | [9]   |
| 1:4 m Zn/Li-70:30 wt% PEG/H <sub>2</sub> O                        | 0.25/0.4                                                                    | 500          | 0.125                      | [10]  |
| 2 m ZnSO <sub>4</sub> +0.0085 m La(NO <sub>3</sub> ) <sub>3</sub> | 1/1                                                                         | 1200         | 0.6                        | [11]  |
|                                                                   | 0.5/0.5                                                                     | 4200         | 1.05                       |       |
| 50%-Bet/ZnSO <sub>4</sub>                                         | 2/2                                                                         | 830          | 0.83                       | [12]  |
|                                                                   | 1/1                                                                         | 1500         | 0.9                        |       |
| 2 M ZnSO <sub>4</sub> in glycerol/water (50/50)                   | 2/6                                                                         | 900          |                            | [13]  |
|                                                                   | 2 M ZnSO <sub>4</sub> +0.08 M ZnF <sub>2</sub>                              | 1/1          | 600                        | 0.3   |
| 2 M ZnSO <sub>4</sub> +5 mM vanilli                               | 1/1                                                                         | 1000         | 0.5                        | [15]  |

|                                                                                                                  |            |             |             |                      |
|------------------------------------------------------------------------------------------------------------------|------------|-------------|-------------|----------------------|
| 1 M ZnSO <sub>4</sub> +4 M<br>EMImCl                                                                             | 1/1        | 500         | 0.25        | [16]                 |
| 1 M ZnSO <sub>4</sub> +0.1 M TSC                                                                                 | 5/1.25     | 200         | 0.5         | [17]                 |
| 1 M Zn(CF <sub>3</sub> SO <sub>3</sub> ) <sub>2</sub> +25<br>mM Zn(H <sub>2</sub> PO <sub>4</sub> ) <sub>2</sub> | 1/1<br>1/5 | 1200<br>800 | 0.6<br>0.4  | [18]                 |
| 3 M Zn(CF <sub>3</sub> SO <sub>3</sub> ) <sub>2</sub> +20<br>mM Zn(NO <sub>3</sub> ) <sub>2</sub>                | 0.5/0.5    | 1200        | 0.3         | [19]                 |
| 7.6 m ZnCl <sub>2</sub> +0.05 m<br>SnCl <sub>2</sub>                                                             | 3/3        | 500         | 0.75        | [20]                 |
| 2 M ZnSO <sub>4</sub> +1 vol%<br>DME                                                                             | 2/2        | 380         | 0.38        | [21]                 |
| 3 M ZnSO <sub>4</sub> in H <sub>2</sub> O/68<br>vol% EG                                                          | 0.5/0.5    | 2268        | 0.667       | [22]                 |
| 1.3 m ZnCl <sub>2</sub> in<br>H <sub>2</sub> O/DMSO (4.3/1)                                                      | 0.5/0.5    | 1000        | 0.25        | [23]                 |
| 4 M Zn(BF <sub>4</sub> ) <sub>2</sub> +2 mM<br>Al(OTf) <sub>3</sub>                                              | 1/0.5      | 1900        | 0.9         | [24]                 |
| <b>2 M ZnSO<sub>4</sub>+0.3 M Gln</b>                                                                            | <b>3/3</b> | <b>700</b>  | <b>1.05</b> | <b>This<br/>work</b> |

## References

- [1] G. Kresse, D. Joubert, *Phys. Rev. B.* **1999**, 59, 1758.
- [2] J. P. Perdew, K. Burke, M. Ernzerhof, *Phys. Rev. Lett.* **1996**, 77, 3865.
- [3] D. J. Chadi, *Phys. Rev. B.* **1977**, 16, 1746.
- [4] B. Tang, J. Zhou, G. Fang, F. Liu, C. Zhu, C. Wang, A. Pan, S. Liang, *J. Mater. Chem. A* **2019**, **7**, 940.
- [5] Q. Zhang, Y. L. Ma, Y. Lu, Y. X. Ni, L. Lin, Z. K. Hao, Z. H. Yan, Q. Zhao, J. Chen, *J. Am. Chem. Soc.* **2022**, 144, 18435.
- [6] K. Zhao, G. L. Fan, J. D. Liu, F. M. Liu, J. H. Li, X. Z. Zhou, Y. X. Ni, M. Yu, Y. M. Zhang, H. Su, Q. H. Liu, F. Y. Cheng, *J. Am. Chem. Soc.* **2022**, 144, 11129.
- [7] D. Wang, D. Lv, H. Liu, S. Zhang, C. Wang, C. Wang, J. Yang, Y. Qian, *Angew. Chem., Int. Ed.* **2022**, e202212839.
- [8] M. J. Qiu, P. Sun, Y. Wang, L. Ma, C. Y. Zhi, W. J. Mai, *Angew. Chem., Int. Ed.* **2022**, 61, e202210979.
- [9] K. Yang, Y. Y. Hu, T. S. Zhang, B. Y. Wang, J. X. Qin, N. X. Li, Z. W. Zhao, J. W. Zhao, D. L. Chao, *Adv. Energy Mater.* **2022**, 12, 2202671.
- [10] D. E. Ciurduc, C. de la Cruz, N. Patil, A. Mavrandonakis, R. Marcilla, *Energy Storage Mater.* **2022**, 53, 532.
- [11] R. R. Zhao, H. F. Wang, H. R. Du, Y. Yang, Z. H. Gao, L. Qie, Y. H. Huang, *Nat. Commun.* **2022**, 13, 3252.
- [12] H. Ren, S. Li, B. Wang, Y. Zhang, T. Wang, Q. Lv, X. Zhang, L. Wang, X. Han, F. Jin, C. Bao, P. Yan, N. Zhang, D. Wang, T. Cheng, H. Liu, S. Dou, *Adv. Mater.* **2022**, e2208237.

- [13] Y. J. Zhang, M. Zhu, K. Wu, F. F. Yu, G. Y. Wang, G. Xu, M. H. Wu, H. K. Liu, S. X. Dou, C. Wu, *J. Mater. Chem. A* **2021**, 9, 4253.
- [14] Y. An, Y. Tian, K. Zhang, Y. Liu, C. Liu, S. Xiong, J. Feng, Y. Qian, *Adv. Funct. Mater.* **2021**, 31, 2101886.
- [15] K. Zhao, F. Liu, G. Fan, J. Liu, M. Yu, Z. Yan, N. Zhang, F. Cheng, *ACS Appl. Mater. Interfaces* **2021**, 13, 47650.
- [16] Q. Zhang, Y. Ma, Y. Lu, X. Zhou, L. Lin, L. Li, Z. Yan, Q. Zhao, K. Zhang, J. Chen, *Angew. Chem., Int. Ed.* **2021**, 60, 23357.
- [17] N. Wang, S. Zhai, Y. Ma, X. Tan, K. Jiang, W. Zhong, W. Zhang, N. Chen, W. Chen, S. Li, G. Han, Z. Li, *Energy Storage Mater.* **2021**, 43, 585.
- [18] X. Zeng, J. Mao, J. Hao, J. Liu, S. Liu, Z. Wang, Y. Wang, S. Zhang, T. Zheng, J. Liu, P. Rao, Z. Guo, *Adv. Mater.* **2021**, 33, e2007416.
- [19] D. Li, L. Cao, T. Deng, S. Liu, C. Wang, *Angew. Chem., Int. Ed.* **2021**, 60, 13035.
- [20] L. Cao, D. Li, F. A. Soto, V. Ponce, B. Zhang, L. Ma, T. Deng, J. M. Seminario, E. Hu, X. Q. Yang, P. B. Balbuena, C. Wang, *Angew. Chem., Int. Ed.* **2021**, 60, 18845.
- [21] J. Cui, X. Liu, Y. Xie, K. Wu, Y. Wang, Y. Liu, J. Zhang, J. Yi, Y. Xia, *Mater. Today Energy* **2020**, 18, 100563.
- [22] R. Qin, Y. Wang, M. Zhang, Y. Wang, S. Ding, A. Song, H. Yi, L. Yang, Y. Song, Y. Cui, J. Liu, Z. Wang, S. Li, Q. Zhao, F. Pan, *Nano Energy* **2021**, 80, 105478.
- [23] L. Cao, D. Li, E. Hu, J. Xu, T. Deng, L. Ma, Y. Wang, X. Q. Yang, C. Wang, *J. Am. Chem. Soc.* **2020**, 142, 21404.
- [24] L. Ma, S. Chen, X. Li, A. Chen, B. Dong, C. Zhi, *Angew. Chem., Int. Ed.* **2020**, 59, 23836.
